# Supplementary material
Source: publisher figshare collection journal article supplement (https://acs.figshare.com/ndownloader/files/9397966)
Supplement: Supplementary file 1 [file 9397966]

## Supporting Information

### **Effect of Pretreatment on Durability of fct-Structured Pt-Based Alloy Catalyst for the Oxygen Reduction Reaction under Operating Conditions in Polymer Electrolyte Membrane Fuel Cells**

Won Suk Jung\* and Branko N. Popov\*

Center for Electrochemical Engineering, Department of Chemical Engineering, University of  
South Carolina, 301 Main Street, Columbia, South Carolina 29208, United States

Number of pages: 7  
Number of tables: 1  
Number of figures: 5

Corresponding author

\* E-mail: wonjeong2015@gmail.com (W.S. Jung)

\* E-mail: popov@cec.sc.edu (B.N. Popov)

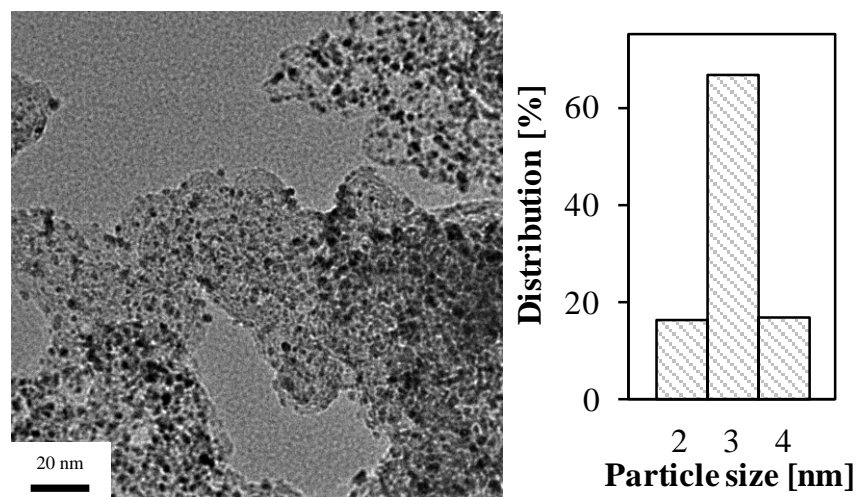

Figure S1. HR-TEM image and corresponding histogram of commercial Pt/C catalyst.

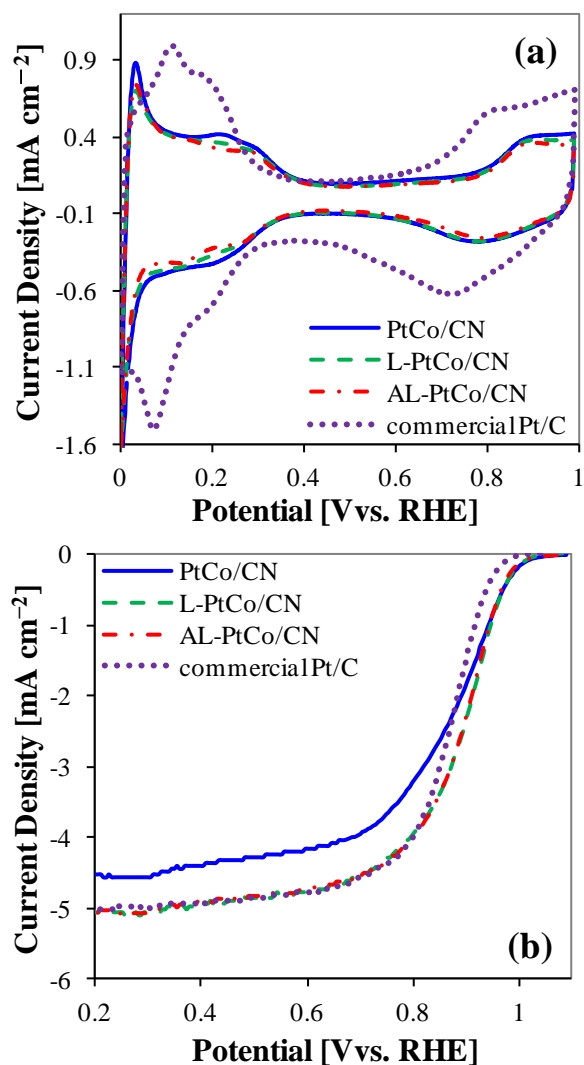

Figure S2. (a) CV diagrams and (b) LSV curves of PtCo/CN, L-PtCo/CN, AL-PtCo/CN and commercial Pt/C catalysts. The CV measurements were carried out at room temperature by sweeping the potential between 0.005 and 1.0 V (vs RHE) at  $50 \text{ mV s}^{-1}$  in  $\text{N}_2$ -saturated 0.1 M  $\text{HClO}_4$ . The LSV measurements were carried out between 0.2 and 1.05 V (vs RHE) at  $5 \text{ mV s}^{-1}$  with 1600 rpm at room temperature in  $\text{O}_2$ -saturated 0.1 M  $\text{HClO}_4$ . The catalyst loading was  $20 \mu\text{g}_{\text{Pt}} \text{ cm}^{-2}$ .

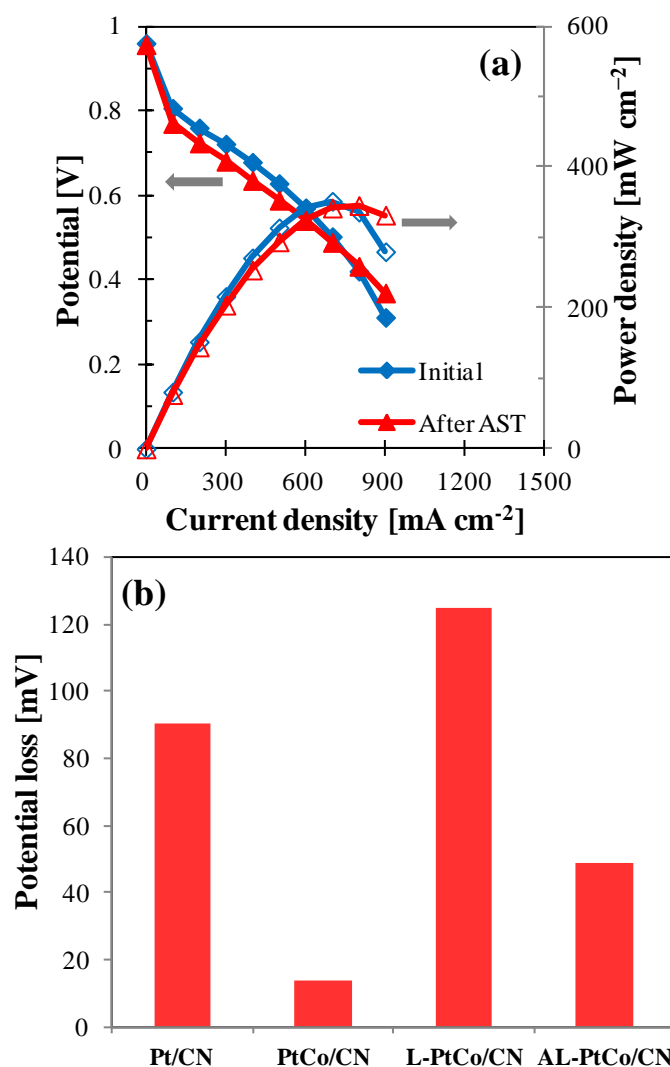

Figure S3. (a) PEMFC polarization and power density curves of the PtCo/CN catalyst before and after AST. (b) The potential losses of Pt/CN, PtCo/CN, L-PtCo/CN, and AL-PtCo/CN catalysts at at  $700 \text{ mA cm}^{-2}$  after AST. The Pt loading at the cathode is fixed at  $0.1 \text{ mg}_{\text{Pt}} \text{ cm}^{-2}$ .  $\text{H}_2$  and air were supplied to the anode and cathode at a stoichiometry of 1.5 and 1.8, respectively. AST was performed under 30000 potential cycles between 0.6 and 1.0 V, supplying fully humidified  $\text{H}_2/\text{N}_2$  to the anode and cathode at  $80^\circ\text{C}$ , respectively.

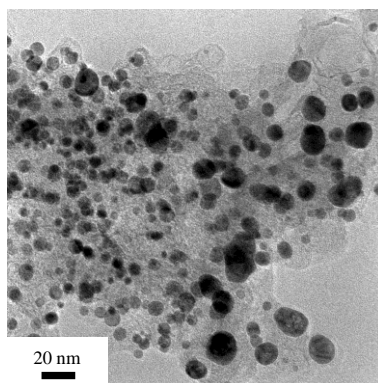

Figure S4. HR-TEM images of PtCo/CN catalyst after AST.

Table S1. Characteristics of the L-PtCo/CN and AL-PtCo/CN catalysts obtained from deconvoluted XPS Pt 4f peaks before and after AST.

|        | Initial |         | after AST |         |
|--------|---------|---------|-----------|---------|
|        | L-PtCo  | AL-PtCo | L-PtCo    | AL-PtCo |
| Pt(0)  | 59.4%   | 69.8%   | 35.5%     | 67.0%   |
| Pt(II) | 24.5%   | 22.8%   | 31.2%     | 23.7%   |
| Pt(IV) | 16.0%   | 7.4%    | 33.2%     | 9.4%    |
| O 1s   | 2.6%    | 2.8%    | 16.7%     | 8.4%    |
| C 1s   | 92.3%   | 92.9%   | 80.4%     | 88.7%   |

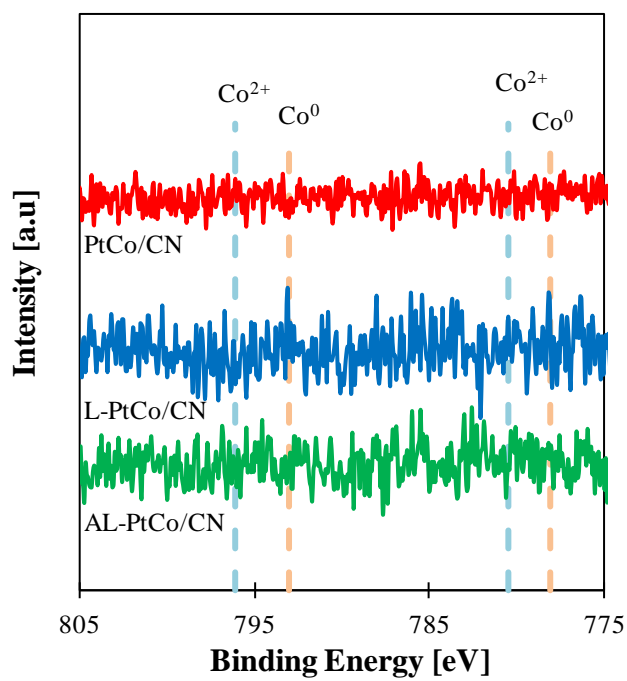

Figure S5. Comparison of XPS spectra of Co 2p of Pt/CN, PtCo/CN, L-PtCo/CN, and AL-PtCo/CN catalysts after AST.
